# Supplementary material for: Molecular Action Mechanism of Coixol from Soft-Shelled Adlay on Tyrosinase: The Future of Cosmetics
Source: MDPI journal article supplement (doi:10.3390/molecules27144626), 2022-07-20
Supplement: s1 [file s1]

## Supplementary

| One-OH polyphenolics occurring in Coicis                                                            |                                                                                      |
|-----------------------------------------------------------------------------------------------------|--------------------------------------------------------------------------------------|
| Coniferyl alcohol                                                                                   | Syringic acid,                                                                       |
| 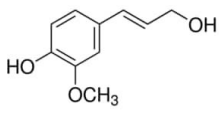                   |     |
| trans-coniferylaldehyde                                                                             | Sinapaldehyde,                                                                       |
|                    |    |
| Ferulic acid                                                                                        | Syringaldehyde                                                                       |
|                    |     |
| <i>p</i> -Hydroxybenzaldehyde                                                                       | Vanillin,                                                                            |
|                  |   |
| Two-OH polyphenolics/flavonoids occurring in Coicis                                                 |                                                                                      |
| Caffeic acid                                                                                        | <a href="#">Syringaresinol</a>                                                       |
| <br>Caffeic Acid |  |
| Chlorogenic acid                                                                                    | 4-ketopinoresinol                                                                    |
|                  |   |
| Naringin                                                                                            |                                                                                      |
|                  |                                                                                      |
| Three-OH polyphenolics/flavonoids occurring in Coicis                                               |                                                                                      |
| <a href="#">Gallic acid</a>                                                                         | Naringenin                                                                           |
|                                                                                                     |                                                                                      |

|                                                                                                         |                                                                                    |
|---------------------------------------------------------------------------------------------------------|------------------------------------------------------------------------------------|
| 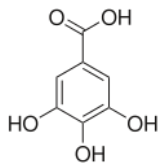                       |  |
| <b>Others</b>                                                                                           |                                                                                    |
| Coixenolide, (11E)-11-Octadecenoic acid (1S,2R)-1-methyl-2-[[ (9Z)-1-oxo-9-hexadecenyl]oxy]propyl ester | Mayuenolide, a lignan                                                              |
|                        |                                                                                    |
| <b>Ceramide</b>                                                                                         |                                                                                    |
|                        |                                                                                    |

**Figure S1.** The cited main polyphenolics and flavonoids identified in coicis.\*

\*Rearranged from Kuo *et al.*(2012) and Ragasa et al., (2014) [4,23].

| <b>Heterocyclic compounds occurring in Coicis</b>                                                                                                                                                                                                                                                                                                                                                                                 |                                                                                      |
|-----------------------------------------------------------------------------------------------------------------------------------------------------------------------------------------------------------------------------------------------------------------------------------------------------------------------------------------------------------------------------------------------------------------------------------|--------------------------------------------------------------------------------------|
| Coixspirolactams A-E                                                                                                                                                                                                                                                                                                                                                                                                              |                                                                                      |
| 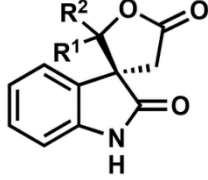 <p><b>Coixspirolactam A</b>, R<sup>1</sup> = R<sup>2</sup> = H<br/> <b>Coixspirolactam B</b>, R<sup>1</sup> = Me, R<sup>2</sup> = H; <b>Coixspirolactam C</b>, R<sup>1</sup> = H, R<sup>2</sup> = Me<br/> <b>Coixspirolactam D</b>, R<sup>1</sup> = Ac, R<sup>2</sup> = H; <b>Coixspirolactam E</b>, R<sup>1</sup> = H, R<sup>2</sup> = Ac</p> |                                                                                      |
| Methyl dioxindole-3-acetate                                                                                                                                                                                                                                                                                                                                                                                                       | Coixol (6-methoxy-2-benzoxazolinone)                                                 |
|                                                                                                                                                                                                                                                                                                                                                |  |

**Figure S2.** Main heterocyclic compounds identified in coicis.\*

\*Rearranged from Kuo *et al.*(2012) and Ragasa et al., (2014) [4,23].

|                                                                                     |                                                                                                     |
|-------------------------------------------------------------------------------------|-----------------------------------------------------------------------------------------------------|
| Potent anti-hTyrosinase compound                                                    | Potent anti-fruit tyrosinase compound                                                               |
| Thiamidol<br>(isobutylamido-thiazolyl-resorcinol)                                   | Omeprazole<br>(5-Methoxy-2-[[ (4-methoxy-3,5-dimethyl-2-pyridinyl)methyl]sulfinyl]-1H-benzimidazol) |
| 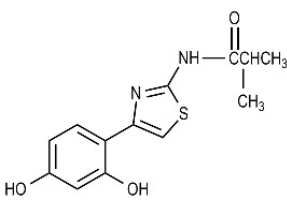 |                  |

**Figure S3.** Potent antityrosinase compounds.

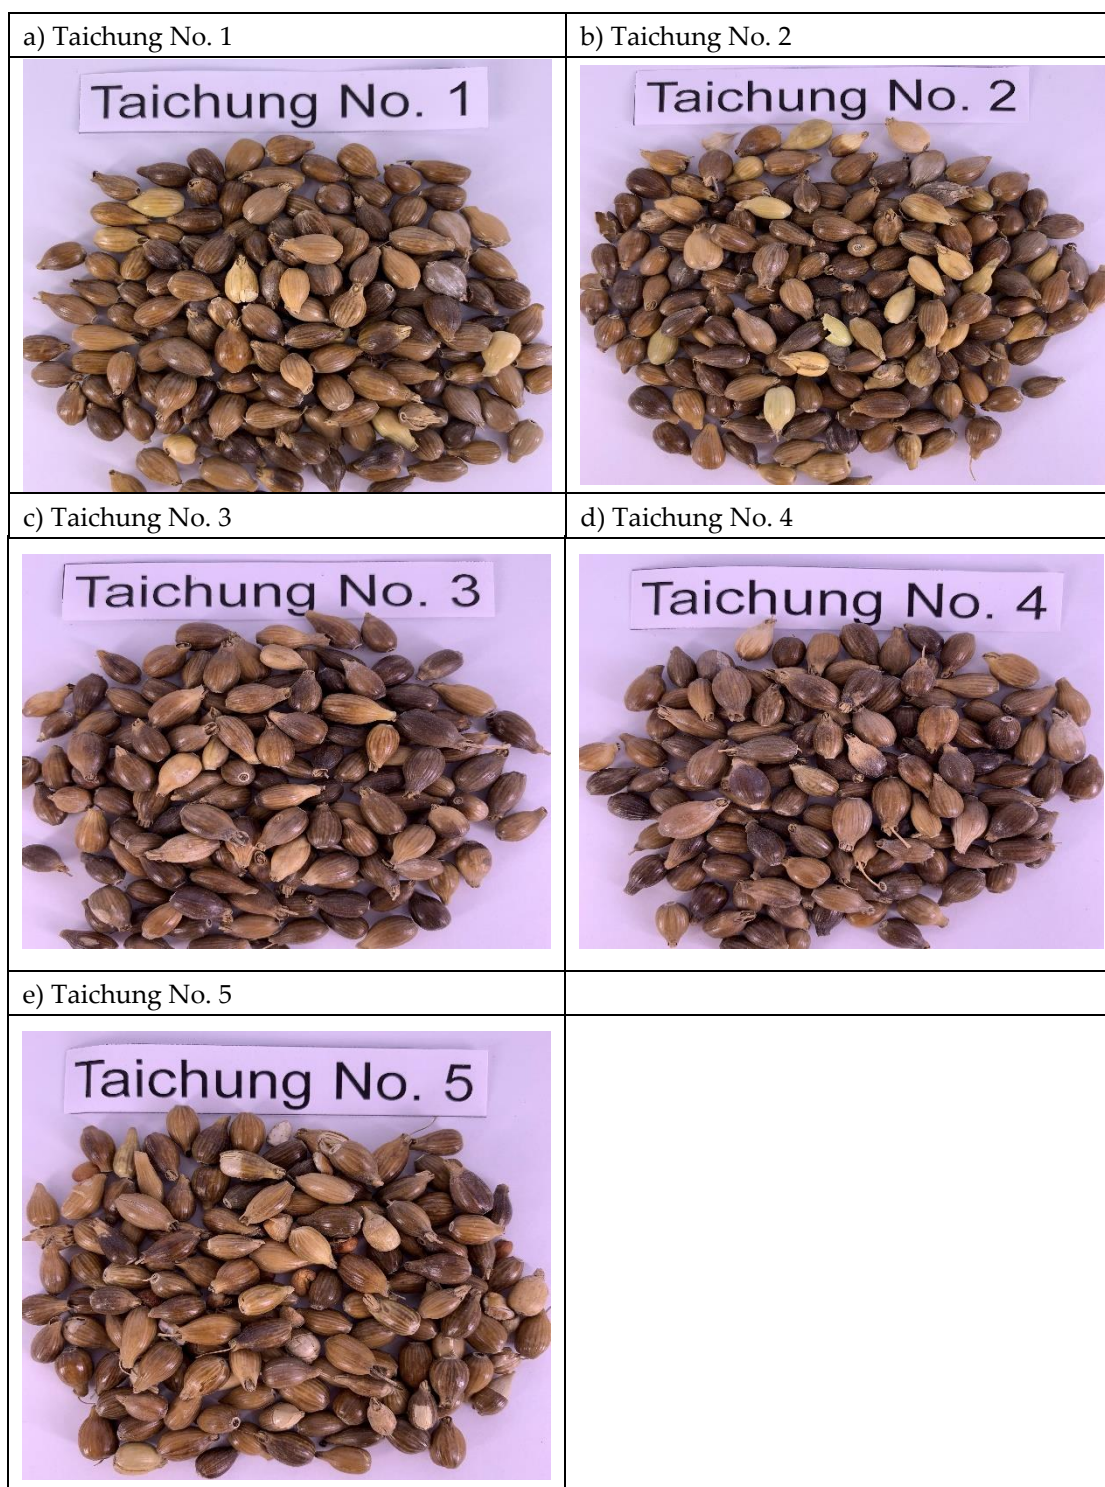

**Figure S4.** Morphology of coicis seeds.

\* a-e: dehulled seeds from different cultivars.
